# Supplementary material for: Respiratory Disease Surveillance in the Middle East and Latin America during the COVID-19 Pandemic, 2020–2022
Source: PubMed Central journal article supplement (PMC11559572; doi:10.3201/eid3014.240303), 2024-11
Supplement: 24-0303-Techapp-s1.pdf [file 24-0303-Techapp-s1.pdf]

*EID cannot ensure accessibility for supplementary materials supplied by authors. Readers who have difficulty accessing supplementary content should contact the authors for assistance.*

# Respiratory Disease Surveillance in the Middle East and Latin America during the COVID-19 Pandemic, 2020–2022

## Appendix

**Appendix Table 1.** Sites names by target population and region in Jordan and six Latin American countries, 2020–2022

| ILI sites                                                                                            | SARI sites                                                                         |
|------------------------------------------------------------------------------------------------------|------------------------------------------------------------------------------------|
| <b>Jordan</b>                                                                                        |                                                                                    |
| 1- Amman AlShamel primary healthcare center located in Amman Governorate (the capital)               | 1- Prince Hamza Hospital located in Amman Governorate center of Jordan             |
| 2- Alsareeh primary healthcare center located in Irbid Governorate, north of Jordan                  | 2- King Abdullah University Hospital located in Irbid Governorate, north of Jordan |
| 3- Almazar primary healthcare center located in Karak Governorate, South of Jordan                   | 3- AlKark Hospital located in Karak Governorate, South of the kingdom              |
| 4- Jarash primary healthcare center located in Jerash Governorate, mid north between Amman and Irbid | 4- AlZarqaa Hospital in Alzarqaa Governorate, northeast of Amman the capital       |
| <b>Guatemala</b>                                                                                     |                                                                                    |
| 1- FUNSALUD, primary health center, Caballo Blanco                                                   | N/A                                                                                |
| <b>Panama</b>                                                                                        |                                                                                    |
| 1- Meteti primary health located in the Darien region                                                | N/A                                                                                |
| <b>Honduras</b>                                                                                      |                                                                                    |
| 1- MEDEL primary health center, JTF-Bravo, Comayagua                                                 | N/A                                                                                |
| <b>Colombia</b>                                                                                      |                                                                                    |
| 1- Hospital Pablo Tobon Uribe, Medellin                                                              | 1- Hospital Pablo Tobon Uribe                                                      |
| 2- Secretaria de Salud del Meta, Villavicencio                                                       | 2- Secretaria de Salud del Meta                                                    |
| 3- C.S. La Esperanza, Cartagena                                                                      |                                                                                    |
| 4- CAP. Blas de Lezo, Cartagena                                                                      |                                                                                    |
| 5- CAP. Canapote, Cartagena                                                                          |                                                                                    |
| 6- CAP. Nuevo Bosque, Cartagena                                                                      |                                                                                    |
| 7- CAP. Olaya Herrera, Cartagena                                                                     |                                                                                    |
| <b>Paraguay</b>                                                                                      |                                                                                    |
| 1- Hospital Regional de Boqueron, Mariscal Estigarribia                                              | 1- Hospital Regional de Boqueron                                                   |
| <b>Peru</b>                                                                                          |                                                                                    |
| 1- C.S. Zarumilla, Tumbes                                                                            | 1- Hosp. Apoyo Iquitos, Loreto                                                     |
| 2- C.S. Bagua, Amazonas                                                                              | 2- Hosp. Edgardo Rebagliati, Lima                                                  |
| 3- C.S. Bellavista-Nanay, Loreto                                                                     | 3- Hosp. Militar Central, Lima                                                     |
| 4- C.S. Quistococha, Loreto                                                                          | 4- Hosp. Regional Demarini Caro, Junin                                             |
| 5- C.S. Zungarococha, Loreto                                                                         | 5- Hosp. Regional FAP, Loreto                                                      |
| 6- C.S. Jorge Chavez, Madre de Dios                                                                  | 6- Hosp. Regional Loreto, Loreto                                                   |
| 7- C.S. La Joya, Madre de Dios                                                                       | 7- Hosp. Santa Gema, Loreto,                                                       |
| 8- C.S. Nuevo Milenio, Madre de Dios                                                                 |                                                                                    |
| 9- C.S. Pachitea, Piura                                                                              |                                                                                    |
| 10- C.S. San Jeronimo, Cusco                                                                         |                                                                                    |
| 11- Spanish Schools, Cusco (Western Travelers)                                                       |                                                                                    |
| 12- Hosp. Apoyo Iquitos, Loreto                                                                      |                                                                                    |
| 13- Hosp. Regional Julio C.Demarini Caro, Junin                                                      |                                                                                    |
| 14- Hosp. Regional Loreto, Loreto                                                                    |                                                                                    |
| 15- Hosp. Santa Gema, Loreto                                                                         |                                                                                    |
| 16- Clinica Naval, Iquitos (Navy), Loreto                                                            |                                                                                    |

| ILI sites                                      | SARI sites |
|------------------------------------------------|------------|
| 17- C.S. Militar (Army), Trujillo, La Libertad |            |
| 18- Hosp. Militar Santa Rosa (Army), Loreto    |            |
| 19- Hosp. Regional FAP (Air Force), Loreto     |            |
| 20- NAMRU SOUTH, Lima                          |            |
| 21- NAMRU SOUTH, Iquitos, Loreto               |            |

**Appendix Table 2.** ILI and SARI case definitions used in in Jordan and six Latin American countries, 2020–2022

| Country           | ILI                                                                                                                                                                                                                                                                                              | SARI                                                                                                                                                                                                                                                                              |
|-------------------|--------------------------------------------------------------------------------------------------------------------------------------------------------------------------------------------------------------------------------------------------------------------------------------------------|-----------------------------------------------------------------------------------------------------------------------------------------------------------------------------------------------------------------------------------------------------------------------------------|
| Kingdom of Jordan | <p>WHO case definition</p> <p>An acute respiratory infection with:</p> <ul style="list-style-type: none"> <li>• measured fever of 38 °C and cough</li> <li>• with onset within the last 10 days</li> </ul>                                                                                       | <p>An acute respiratory infection with:</p> <ul style="list-style-type: none"> <li>• history of fever or measured fever of ≥ 38 C°.</li> <li>• and cough.</li> <li>• with onset within the last 10 days.</li> <li>• and requires hospitalization</li> </ul>                       |
| Latin America     | <p>WHO modified case definition</p> <p>An acute respiratory infection with:</p> <ul style="list-style-type: none"> <li>• measured fever of 38°C in the last 48hrs</li> <li>• and cough or sore throat or rhinorrhea</li> <li>• with onset within the last 5 days</li> </ul>                      | <p>An acute respiratory infection with:</p> <ul style="list-style-type: none"> <li>• history of fever or measured fever of 38°C;</li> <li>• cough or sore throat or rhinorrhea or</li> <li>• myalgia, with onset within the last 10 days and require hospitalization</li> </ul>   |
|                   | <p>Peruvian MoH COVID-19 case definition 2020-2022</p> <p>An acute respiratory infection with onset within the last 10 days with 2 or more of the following symptoms:</p> <ul style="list-style-type: none"> <li>• cough or sore throat or myalgia or</li> <li>• stuffy nose or fever</li> </ul> | <p>An acute respiratory infection with onset within the last 10 days with 2 or more of the following symptoms:</p> <ul style="list-style-type: none"> <li>• cough or sore throat or myalgia or</li> <li>• stuffy nose or fever</li> <li>• and requires hospitalization</li> </ul> |

**Appendix Table 3.** Respiratory pathogens tested by FTD-33 and Biofire RP 2.1. Tests used in in Jordan and six Latin America countries, 2020–2022.

| Virus                                 | FTD-33 | RP 2.1 |
|---------------------------------------|--------|--------|
| SARS-CoV-2                            | N      | Y      |
| Influenza virus                       |        |        |
| influenza A                           | Y      | Y      |
| influenza A (H1N1) pdm09              | Y      | Y      |
| influenza A (H1N1)                    | N      | Y      |
| influenza A (H3N2)                    | Y      | Y      |
| influenza B                           | Y      | Y      |
| influenza C                           | Y      | N      |
| Parainfluenza virus (PIV)             |        |        |
| PIV1                                  | Y      | Y      |
| PIV2                                  | Y      | Y      |
| PIV3                                  | Y      | Y      |
| PIV4                                  | Y      | Y      |
| Seasonal Coronavirus (CoV)            |        |        |
| CoV NL63                              | Y      | Y      |
| CoV 229E,                             | Y      | Y      |
| CoV OC43,                             | Y      | Y      |
| CoV HKU1                              | Y      | Y      |
| Human Metapneumovirus (hMPV) A&B      | Y      | Y      |
| Rhinovirus/Enterovirus (RV/EV)        | N      | Y      |
| Rhinovirus                            | Y      | N      |
| Enterovirus                           | Y      | N      |
| Respiratory Syncytial Virus (RSV)A &B | Y      | Y      |
| Adenovirus                            | Y      | Y      |
| Parechovirus                          | Y      | N      |
| Bocavirus                             | Y      | N      |
| <b>Bacteria</b>                       |        |        |
| <i>Pneumocystis jirovecii</i>         | Y      | N      |
| <i>Mycoplasma pneumoniae</i>          | Y      | Y      |
| <i>Chlamydia pneumoniae</i>           | Y      | Y      |
| <i>Streptococcus pneumoniae</i> ,     | Y      | N      |

| Virus                                                          | FTD-33 | RP 2.1 |
|----------------------------------------------------------------|--------|--------|
| <i>Hemophilus influenzae</i>                                   | Y      | N      |
| <i>Hemophilus influenzae</i> type B                            | Y      | N      |
| <i>Staphylococcus aureus</i>                                   | Y      | N      |
| <i>Moraxella catarrhalis</i>                                   | Y      | N      |
| <i>Bordetella</i> species (excluding <i>B. parapertussis</i> ) | Y      | Y      |
| <i>Bordetella pertussis</i>                                    | N      | Y      |
| <i>Bordetella parapertussis</i>                                | Y      | N      |
| <i>Klebsiella pneumoniae</i>                                   | Y      | N      |
| <i>Legionella</i> sp                                           | Y      | N      |
| <i>Salmonella</i> sp                                           | Y      | N      |
